# Supplementary material for: Design, Preparation, and Physicochemical Characterisation of Alginate-Based Honey-Loaded Topical Formulations
Source: MDPI journal article supplement (doi:10.3390/pharmaceutics15051483), 2023-05-12
Supplement: s1 [file s1]

# **Design, Preparation, and Physicochemical Characterisation of Alginate-Based Honey-Loaded Topical Formulations**

**Md Lokman Hossain <sup>1</sup>, Lee Yong Lim <sup>1</sup>, Katherine Hammer <sup>2,3</sup>, Dhanushka Hettiarachchi <sup>1</sup> and Cornelia Locher <sup>1,3,\*</sup>**

<sup>1</sup> Division of Pharmacy, School of Allied Health, University of Western Australia, Crawley WA 6009, Australia; mdlokman.hossain@research.uwa.edu.au (M.L.H.); lee.lim@uwa.edu.au (L.Y.L.); dhanushka.hettiarachchi@outlook.com (D.H.)

<sup>2</sup> School of Biomedical Sciences, University of Western Australia, Crawley WA 6009, Australia; katherine.hammer@uwa.edu.au (K.H.)

<sup>3</sup> Cooperative Research Centre for Honey Bee Products Limited, 128 Yanchep Beach Road, Yanchep, WA 6035, Australia

\* Correspondence: connie.locher@uwa.edu.au

**Table S1.** pH of neat honeys and pre-gel solution formulations (n=3, data represents mean  $\pm$  SD).

| Honey       | Storage temperature (°C) | Sample           | pH              |                 |                 |                 |                 |                 |
|-------------|--------------------------|------------------|-----------------|-----------------|-----------------|-----------------|-----------------|-----------------|
|             |                          |                  | 1 month         | 2 months        | 3 months        | 4 months        | 5 months        | 6 months        |
| Jarrah      | 5                        | Neat Honey       | 4.61 $\pm$ 0.02 | 4.60 $\pm$ 0.03 | 4.61 $\pm$ 0.02 | 4.61 $\pm$ 0.03 | 4.61 $\pm$ 0.02 | 4.62 $\pm$ 0.03 |
|             |                          | Pre-gel solution | 5.29 $\pm$ 0.03 | 5.28 $\pm$ 0.03 | 5.30 $\pm$ 0.03 | 5.31 $\pm$ 0.04 | 5.31 $\pm$ 0.03 | 5.31 $\pm$ 0.03 |
|             | 30                       | Neat Honey       | 4.60 $\pm$ 0.03 | 4.61 $\pm$ 0.03 | 4.59 $\pm$ 0.03 | 4.60 $\pm$ 0.02 | 4.61 $\pm$ 0.02 | 4.62 $\pm$ 0.02 |
|             |                          | Pre-gel solution | 5.29 $\pm$ 0.02 | 5.30 $\pm$ 0.03 | 5.29 $\pm$ 0.02 | 5.29 $\pm$ 0.02 | 5.29 $\pm$ 0.02 | 5.30 $\pm$ 0.04 |
|             | 40                       | Neat Honey       | 4.62 $\pm$ 0.02 | 4.61 $\pm$ 0.03 | 4.62 $\pm$ 0.02 | 4.61 $\pm$ 0.03 | 4.62 $\pm$ 0.02 | 4.63 $\pm$ 0.03 |
|             |                          | Pre-gel solution | 5.30 $\pm$ 0.04 | 5.29 $\pm$ 0.03 | 5.29 $\pm$ 0.03 | 5.31 $\pm$ 0.04 | 5.30 $\pm$ 0.03 | 5.31 $\pm$ 0.03 |
| WA Manuka 2 | 5                        | Neat Honey       | 4.63 $\pm$ 0.01 | 4.62 $\pm$ 0.03 | 4.61 $\pm$ 0.02 | 4.63 $\pm$ 0.03 | 4.62 $\pm$ 0.03 | 4.62 $\pm$ 0.02 |
|             |                          | Pre-gel solution | 5.40 $\pm$ 0.02 | 5.39 $\pm$ 0.03 | 5.39 $\pm$ 0.04 | 5.41 $\pm$ 0.3  | 5.40 $\pm$ 0.04 | 5.38 $\pm$ 0.02 |
|             | 30                       | Neat Honey       | 4.61 $\pm$ 0.02 | 4.60 $\pm$ 0.03 | 4.59 $\pm$ 0.03 | 4.59 $\pm$ 0.03 | 4.60 $\pm$ 0.03 | 4.61 $\pm$ 0.03 |
|             |                          | Pre-gel solution | 5.38 $\pm$ 0.02 | 5.39 $\pm$ 0.03 | 5.39 $\pm$ 0.04 | 5.39 $\pm$ 0.3  | 5.40 $\pm$ 0.04 | 5.39 $\pm$ 0.03 |
|             | 40                       | Neat Honey       | 4.63 $\pm$ 0.02 | 4.62 $\pm$ 0.03 | 4.61 $\pm$ 0.02 | 4.62 $\pm$ 0.03 | 4.61 $\pm$ 0.03 | 4.62 $\pm$ 0.03 |
|             |                          | Pre-gel solution | 5.38 $\pm$ 0.02 | 5.40 $\pm$ 0.03 | 5.40 $\pm$ 0.04 | 5.41 $\pm$ 0.3  | 5.40 $\pm$ 0.03 | 5.29 $\pm$ 0.02 |

**Table S2.** Moisture content (%) of neat honeys and pre-gel solution formulations (n=3, data represents mean  $\pm$  SD).

| Honey       | Storage temperature (°C) | Sample           | Moisture content (%) |                 |                 |                 |                 |                 |
|-------------|--------------------------|------------------|----------------------|-----------------|-----------------|-----------------|-----------------|-----------------|
|             |                          |                  | 1 month              | 2 months        | 3 months        | 4 months        | 5 months        | 6 months        |
| Jarrah      | 5                        | Neat Honey       | 17.85 $\pm$ 0.3      | 17.87 $\pm$ 0.2 | 17.88 $\pm$ 0.1 | 17.87 $\pm$ 0.2 | 17.87 $\pm$ 0.3 | 17.87 $\pm$ 0.2 |
|             |                          | Pre-gel solution | 48.98 $\pm$ 0.2      | 48.96 $\pm$ 0.1 | 48.97 $\pm$ 0.2 | 48.96 $\pm$ 0.1 | 48.95 $\pm$ 0.2 | 48.95 $\pm$ 0.3 |
|             | 30                       | Neat Honey       | 17.87 $\pm$ 0.3      | 17.86 $\pm$ 0.2 | 17.87 $\pm$ 0.1 | 17.86 $\pm$ 0.2 | 17.86 $\pm$ 0.3 | 17.87 $\pm$ 0.2 |
|             |                          | Pre-gel solution | 48.86 $\pm$ 0.2      | 48.87 $\pm$ 0.1 | 48.87 $\pm$ 0.2 | 48.88 $\pm$ 0.1 | 48.89 $\pm$ 0.2 | 48.91 $\pm$ 0.3 |
|             | 40                       | Neat Honey       | 17.89 $\pm$ 0.3      | 17.87 $\pm$ 0.2 | 17.86 $\pm$ 0.1 | 17.87 $\pm$ 0.2 | 17.88 $\pm$ 0.3 | 17.88 $\pm$ 0.2 |
|             |                          | Pre-gel solution | 48.85 $\pm$ 0.2      | 48.84 $\pm$ 0.1 | 48.84 $\pm$ 0.2 | 48.85 $\pm$ 0.1 | 48.84 $\pm$ 0.2 | 48.85 $\pm$ 0.3 |
| WA Manuka 2 | 5                        | Neat Honey       | 19.45 $\pm$ 0.2      | 19.41 $\pm$ 0.2 | 19.44 $\pm$ 0.1 | 19.43 $\pm$ 0.2 | 19.42 $\pm$ 0.3 | 19.44 $\pm$ 0.2 |
|             |                          | Pre-gel solution | 49.08 $\pm$ 0.2      | 49.08 $\pm$ 0.1 | 49.07 $\pm$ 0.2 | 49.10 $\pm$ 0.3 | 49.09 $\pm$ 0.2 | 49.09 $\pm$ 0.3 |
|             | 30                       | Neat Honey       | 19.44 $\pm$ 0.2      | 19.41 $\pm$ 0.2 | 19.42 $\pm$ 0.1 | 19.41 $\pm$ 0.2 | 19.42 $\pm$ 0.3 | 19.41 $\pm$ 0.2 |
|             |                          | Pre-gel solution | 49.08 $\pm$ 0.2      | 49.09 $\pm$ 0.1 | 49.08 $\pm$ 0.2 | 49.10 $\pm$ 0.3 | 49.07 $\pm$ 0.2 | 49.08 $\pm$ 0.3 |
|             | 40                       | Neat Honey       | 19.43 $\pm$ 0.2      | 19.42 $\pm$ 0.2 | 19.44 $\pm$ 0.1 | 19.43 $\pm$ 0.2 | 19.42 $\pm$ 0.3 | 19.43 $\pm$ 0.2 |
|             |                          | Pre-gel solution | 49.08 $\pm$ 0.2      | 49.09 $\pm$ 0.1 | 49.10 $\pm$ 0.2 | 49.11 $\pm$ 0.3 | 49.11 $\pm$ 0.2 | 49.10 $\pm$ 0.3 |

**Table S3.** Spreadability (g.cm/sec) of neat honeys and pre-gel solution formulations (n=3, data represents mean  $\pm$  SD).

| Honey       | Storage temperature (°C) | Sample           | Spreadability (g.cm/sec) |                  |                  |                  |                  |                  |
|-------------|--------------------------|------------------|--------------------------|------------------|------------------|------------------|------------------|------------------|
|             |                          |                  | 1 month                  | 2 months         | 3 months         | 4 months         | 5 months         | 6 months         |
| Jarrah      | 5                        | Neat Honey       | 334.77 $\pm$ 0.2         | 334.76 $\pm$ 0.2 | 334.74 $\pm$ 0.1 | 334.73 $\pm$ 0.2 | 334.74 $\pm$ 0.2 | 334.75 $\pm$ 0.2 |
|             |                          | Pre-gel solution | 425.15 $\pm$ 0.1         | 425.14 $\pm$ 0.2 | 425.14 $\pm$ 0.1 | 425.13 $\pm$ 0.2 | 425.13 $\pm$ 0.1 | 425.14 $\pm$ 0.2 |
|             | 30                       | Neat Honey       | 336.77 $\pm$ 0.2         | 336.76 $\pm$ 0.2 | 337.74 $\pm$ 0.1 | 337.73 $\pm$ 0.2 | 337.72 $\pm$ 0.2 | 337.75 $\pm$ 0.2 |
|             |                          | Pre-gel solution | 427.15 $\pm$ 0.1         | 427.14 $\pm$ 0.2 | 428.14 $\pm$ 0.1 | 427.13 $\pm$ 0.2 | 428.13 $\pm$ 0.1 | 428.14 $\pm$ 0.3 |
|             | 40                       | Neat Honey       | 338.77 $\pm$ 0.2         | 338.76 $\pm$ 0.2 | 337.74 $\pm$ 0.1 | 337.73 $\pm$ 0.2 | 337.72 $\pm$ 0.2 | 337.75 $\pm$ 0.2 |
|             |                          | Pre-gel solution | 427.15 $\pm$ 0.1         | 427.14 $\pm$ 0.2 | 426.14 $\pm$ 0.1 | 426.13 $\pm$ 0.2 | 427.13 $\pm$ 0.1 | 427.14 $\pm$ 0.3 |
| WA Manuka 2 | 5                        | Neat Honey       | 325.47 $\pm$ 0.2         | 325.46 $\pm$ 0.3 | 325.45 $\pm$ 0.2 | 325.47 $\pm$ 0.3 | 325.44 $\pm$ 0.2 | 325.45 $\pm$ 0.2 |
|             |                          | Pre-gel solution | 424.93 $\pm$ 0.2         | 424.94 $\pm$ 0.1 | 424.93 $\pm$ 0.2 | 424.94 $\pm$ 0.1 | 424.95 $\pm$ 0.3 | 424.94 $\pm$ 0.1 |
|             | 30                       | Neat Honey       | 35.47 $\pm$ 0.2          | 324.46 $\pm$ 0.3 | 324.45 $\pm$ 0.2 | 324.47 $\pm$ 0.3 | 324.44 $\pm$ 0.2 | 324.45 $\pm$ 0.2 |
|             |                          | Pre-gel solution | 425.93 $\pm$ 0.2         | 426.94 $\pm$ 0.1 | 426.93 $\pm$ 0.2 | 426.94 $\pm$ 0.1 | 426.95 $\pm$ 0.1 | 426.94 $\pm$ 0.1 |
|             | 40                       | Neat Honey       | 325.47 $\pm$ 0.2         | 324.46 $\pm$ 0.3 | 324.45 $\pm$ 0.1 | 324.47 $\pm$ 0.3 | 324.44 $\pm$ 0.2 | 324.45 $\pm$ 0.3 |
|             |                          | Pre-gel solution | 424.93 $\pm$ 0.2         | 423.94 $\pm$ 0.1 | 423.93 $\pm$ 0.2 | 423.94 $\pm$ 0.1 | 423.95 $\pm$ 0.3 | 423.94 $\pm$ 0.2 |

**Table S4.** Thickness (mm) of wet and dry sheet (n=3, data represents mean  $\pm$  SD).

| Honey       | Storage temperature (°C) | Sample | Thickness (mm)  |                 |                 |                 |                 |                 |
|-------------|--------------------------|--------|-----------------|-----------------|-----------------|-----------------|-----------------|-----------------|
|             |                          |        | 1 month         | 2 months        | 3 months        | 4 months        | 5 months        | 6 months        |
| Jarrah      | 5                        | Wet    | 2.01 $\pm$ 0.02 | 2.02 $\pm$ 0.02 | 2.00 $\pm$ 0.03 | 2.03 $\pm$ 0.02 | 2.01 $\pm$ 0.01 | 2.02 $\pm$ 0.02 |
|             |                          | Dry    | 1.41 $\pm$ 0.02 | 1.41 $\pm$ 0.02 | 1.40 $\pm$ 0.02 | 1.39 $\pm$ 0.01 | 1.40 $\pm$ 0.02 | 1.41 $\pm$ 0.03 |
|             | 30                       | Wet    | 2.02 $\pm$ 0.02 | 2.02 $\pm$ 0.02 | 2.01 $\pm$ 0.03 | 2.01 $\pm$ 0.02 | 2.01 $\pm$ 0.01 | 2.00 $\pm$ 0.02 |
|             |                          | Dry    | 1.41 $\pm$ 0.02 | 1.40 $\pm$ 0.01 | 1.40 $\pm$ 0.02 | 1.39 $\pm$ 0.01 | 1.39 $\pm$ 0.02 | 1.39 $\pm$ 0.03 |
|             | 40                       | Wet    | 2.02 $\pm$ 0.02 | 2.01 $\pm$ 0.02 | 2.01 $\pm$ 0.03 | 2.01 $\pm$ 0.02 | 2.00 $\pm$ 0.01 | 2.00 $\pm$ 0.02 |
|             |                          | Dry    | 1.40 $\pm$ 0.02 | 1.40 $\pm$ 0.01 | 1.39 $\pm$ 0.02 | 1.39 $\pm$ 0.01 | 1.39 $\pm$ 0.02 | 1.39 $\pm$ 0.03 |
| WA Manuka 2 | 5                        | Wet    | 2.01 $\pm$ 0.02 | 2.01 $\pm$ 0.02 | 2.02 $\pm$ 0.01 | 2.02 $\pm$ 0.02 | 2.02 $\pm$ 0.01 | 2.01 $\pm$ 0.02 |
|             |                          | Dry    | 1.39 $\pm$ 0.02 | 1.40 $\pm$ 0.02 | 1.39 $\pm$ 0.03 | 1.40 $\pm$ 0.02 | 1.40 $\pm$ 0.03 | 1.39 $\pm$ 0.02 |
|             | 30                       | Wet    | 2.02 $\pm$ 0.01 | 2.02 $\pm$ 0.02 | 2.02 $\pm$ 0.01 | 2.01 $\pm$ 0.02 | 2.01 $\pm$ 0.01 | 2.01 $\pm$ 0.02 |
|             |                          | Dry    | 1.39 $\pm$ 0.01 | 1.40 $\pm$ 0.01 | 1.39 $\pm$ 0.02 | 1.40 $\pm$ 0.02 | 1.40 $\pm$ 0.03 | 1.39 $\pm$ 0.02 |
|             | 40                       | Wet    | 2.01 $\pm$ 0.02 | 2.00 $\pm$ 0.02 | 2.00 $\pm$ 0.01 | 2.00 $\pm$ 0.02 | 2.01 $\pm$ 0.01 | 2.01 $\pm$ 0.02 |
|             |                          | Dry    | 1.40 $\pm$ 0.02 | 1.40 $\pm$ 0.01 | 1.39 $\pm$ 0.01 | 1.40 $\pm$ 0.02 | 1.40 $\pm$ 0.03 | 1.39 $\pm$ 0.02 |

**Table S5.** Length (mm) of wet and dry sheet (n=3, data represents mean  $\pm$  SD).

| Honey       | Storage temperature (°C) | Sample | Length (mm)      |                  |                  |                  |                  |                  |
|-------------|--------------------------|--------|------------------|------------------|------------------|------------------|------------------|------------------|
|             |                          |        | 1 month          | 2 months         | 3 months         | 4 months         | 5 months         | 6 months         |
| Jarrah      | 5                        | Wet    | 94.29 $\pm$ 0.02 | 94.27 $\pm$ 0.03 | 94.26 $\pm$ 0.02 | 94.25 $\pm$ 0.03 | 94.26 $\pm$ 0.03 | 94.27 $\pm$ 0.02 |
|             |                          | Dry    | 93.32 $\pm$ 0.02 | 93.31 $\pm$ 0.03 | 93.34 $\pm$ 0.02 | 93.34 $\pm$ 0.02 | 93.33 $\pm$ 0.03 | 93.34 $\pm$ 0.02 |
|             | 30                       | Wet    | 94.28 $\pm$ 0.02 | 94.26 $\pm$ 0.02 | 94.27 $\pm$ 0.03 | 94.25 $\pm$ 0.03 | 94.27 $\pm$ 0.03 | 94.27 $\pm$ 0.03 |
|             |                          | Dry    | 93.31 $\pm$ 0.01 | 93.30 $\pm$ 0.02 | 93.33 $\pm$ 0.02 | 93.32 $\pm$ 0.03 | 93.31 $\pm$ 0.03 | 93.34 $\pm$ 0.02 |
|             | 40                       | Wet    | 94.28 $\pm$ 0.02 | 94.27 $\pm$ 0.03 | 94.28 $\pm$ 0.02 | 94.26 $\pm$ 0.02 | 94.26 $\pm$ 0.03 | 94.26 $\pm$ 0.02 |
|             |                          | Dry    | 93.30 $\pm$ 0.02 | 93.30 $\pm$ 0.01 | 93.32 $\pm$ 0.02 | 93.33 $\pm$ 0.01 | 93.33 $\pm$ 0.03 | 93.32 $\pm$ 0.02 |
| WA Manuka 2 | 5                        | Wet    | 94.25 $\pm$ 0.02 | 94.23 $\pm$ 0.02 | 94.23 $\pm$ 0.01 | 94.24 $\pm$ 0.03 | 94.24 $\pm$ 0.02 | 94.21 $\pm$ 0.02 |
|             |                          | Dry    | 93.28 $\pm$ 0.02 | 93.27 $\pm$ 0.02 | 93.27 $\pm$ 0.02 | 93.28 $\pm$ 0.02 | 93.27 $\pm$ 0.02 | 93.27 $\pm$ 0.03 |
|             | 30                       | Wet    | 94.26 $\pm$ 0.02 | 94.24 $\pm$ 0.02 | 94.24 $\pm$ 0.01 | 94.24 $\pm$ 0.03 | 94.25 $\pm$ 0.02 | 94.23 $\pm$ 0.02 |
|             |                          | Dry    | 93.27 $\pm$ 0.02 | 93.26 $\pm$ 0.02 | 93.25 $\pm$ 0.02 | 93.27 $\pm$ 0.02 | 93.27 $\pm$ 0.02 | 93.24 $\pm$ 0.03 |
|             | 40                       | Wet    | 94.26 $\pm$ 0.02 | 94.24 $\pm$ 0.03 | 94.23 $\pm$ 0.01 | 94.25 $\pm$ 0.02 | 94.25 $\pm$ 0.02 | 94.22 $\pm$ 0.02 |
|             |                          | Dry    | 93.26 $\pm$ 0.02 | 93.25 $\pm$ 0.02 | 93.26 $\pm$ 0.01 | 93.27 $\pm$ 0.02 | 93.27 $\pm$ 0.02 | 93.27 $\pm$ 0.01 |

**Table S6.** Tensile strength of honey-loaded wet and dry sheets (n=3, data represents mean  $\pm$  SD).

| Honey       | Storage temperature (°C) | Sample | Tensile strength (Pa) |                   |                   |                   |                   |                   |
|-------------|--------------------------|--------|-----------------------|-------------------|-------------------|-------------------|-------------------|-------------------|
|             |                          |        | 1 month               | 2 months          | 3 months          | 4 months          | 5 months          | 6 months          |
| Jarrah      | 5                        | Wet    | 107.18 $\pm$ 0.31     | 106.75 $\pm$ 0.25 | 106.85 $\pm$ 0.26 | 106.65 $\pm$ 0.28 | 106.76 $\pm$ 0.29 | 106.69 $\pm$ 0.31 |
|             |                          | Dry    | 193.33 $\pm$ 0.32     | 193.35 $\pm$ 0.34 | 193.28 $\pm$ 0.31 | 193.27 $\pm$ 0.35 | 193.41 $\pm$ 0.35 | 193.36 $\pm$ 0.32 |
|             | 30                       | Wet    | 107.38 $\pm$ 0.21     | 107.35 $\pm$ 0.25 | 107.37 $\pm$ 0.26 | 107.45 $\pm$ 0.28 | 107.76 $\pm$ 0.29 | 107.89 $\pm$ 0.21 |
|             |                          | Dry    | 193.83 $\pm$ 0.22     | 193.95 $\pm$ 0.24 | 194.09 $\pm$ 0.21 | 194.17 $\pm$ 0.25 | 194.41 $\pm$ 0.25 | 195.86 $\pm$ 0.22 |
|             | 40                       | Wet    | 107.78 $\pm$ 0.21     | 107.95 $\pm$ 0.25 | 108.15 $\pm$ 0.26 | 108.25 $\pm$ 0.28 | 108.86 $\pm$ 0.29 | 108.87 $\pm$ 0.21 |
|             |                          | Dry    | 194.33 $\pm$ 0.22     | 194.35 $\pm$ 0.24 | 194.58 $\pm$ 0.21 | 195.16 $\pm$ 0.25 | 195.47 $\pm$ 0.25 | 195.66 $\pm$ 0.26 |
| WA Manuka 2 | 5                        | Wet    | 108.33 $\pm$ 0.32     | 108.31 $\pm$ 0.34 | 108.31 $\pm$ 0.32 | 108.31 $\pm$ 0.29 | 108.31 $\pm$ 0.34 | 108.31 $\pm$ 0.34 |
|             |                          | Dry    | 194.65 $\pm$ 0.32     | 194.62 $\pm$ 0.32 | 194.72 $\pm$ 0.32 | 194.32 $\pm$ 0.32 | 194.75 $\pm$ 0.32 | 194.64 $\pm$ 0.32 |
|             | 30                       | Wet    | 108.64 $\pm$ 0.22     | 108.86 $\pm$ 0.24 | 108.93 $\pm$ 0.22 | 109.11 $\pm$ 0.29 | 109.43 $\pm$ 0.24 | 109.66 $\pm$ 0.24 |
|             |                          | Dry    | 194.85 $\pm$ 0.22     | 194.95 $\pm$ 0.22 | 195.32 $\pm$ 0.22 | 195.52 $\pm$ 0.22 | 195.65 $\pm$ 0.22 | 195.97 $\pm$ 0.22 |
|             | 40                       | Wet    | 108.93 $\pm$ 0.22     | 108.99 $\pm$ 0.24 | 109.09 $\pm$ 0.22 | 109.11 $\pm$ 0.29 | 109.22 $\pm$ 0.24 | 109.41 $\pm$ 0.24 |
|             |                          | Dry    | 194.95 $\pm$ 0.22     | 195.22 $\pm$ 0.22 | 195.32 $\pm$ 0.22 | 195.42 $\pm$ 0.22 | 195.77 $\pm$ 0.32 | 195.88 $\pm$ 0.22 |

**Table S7.** Swelling Index of Dry Sheets at 5°C (n=3, data represents mean ± SD).

| Duration of stability study (month) | Time (min) | Sample (Dry sheet) |                   |
|-------------------------------------|------------|--------------------|-------------------|
|                                     |            | WA Jarrah Honey    | WA Manuka Honey 2 |
| 1                                   | 10         | 52.12±0.15         | 54.52±0.16        |
|                                     | 20         | 55.57±0.17         | 58.60±0.19        |
|                                     | 30         | 55.61±0.15         | 58.63±0.16        |
| 2                                   | 10         | 52.11±0.12         | 54.51±0.16        |
|                                     | 20         | 55.58±0.17         | 58.59±0.16        |
|                                     | 30         | 55.59±0.15         | 58.62±0.16        |
| 3                                   | 10         | 52.12±0.12         | 54.51±0.19        |
|                                     | 20         | 55.61±0.17         | 58.59±0.19        |
|                                     | 30         | 55.62±0.15         | 58.62±0.19        |
| 4                                   | 10         | 52.09±0.12         | 54.52±0.16        |
|                                     | 20         | 55.55±0.18         | 58.53±0.16        |
|                                     | 30         | 55.58±0.15         | 58.61±0.16        |
| 5                                   | 10         | 52.08±0.12         | 54.51±0.19        |
|                                     | 20         | 55.57±0.17         | 58.52±0.19        |
|                                     | 30         | 55.59±0.15         | 58.63±0.16        |
| 6                                   | 10         | 52.11±0.17         | 54.51±0.18        |
|                                     | 20         | 55.56±0.17         | 58.59±0.19        |
|                                     | 30         | 55.59±0.17         | 58.61±0.21        |

**Table S8.** Swelling Index of Dry Sheets at 30°C (n=3, data represents mean ± SD).

| Duration of stability study (month) | Time (min) | Sample (Dry sheet) |                   |
|-------------------------------------|------------|--------------------|-------------------|
|                                     |            | WA Jarrah Honey    | WA Manuka Honey 2 |
| 1                                   | 10         | 52.22±0.17         | 54.32±0.18        |
|                                     | 20         | 55.55±0.15         | 58.57±0.19        |
|                                     | 30         | 55.60±0.15         | 58.60±0.17        |
| 2                                   | 10         | 52.21±0.12         | 54.31±0.16        |
|                                     | 20         | 55.56±0.17         | 58.56±0.16        |
|                                     | 30         | 55.59±0.15         | 58.60±0.16        |
| 3                                   | 10         | 52.12±0.12         | 54.31±0.19        |
|                                     | 20         | 55.56±0.17         | 58.57±0.17        |
|                                     | 30         | 55.59±0.17         | 58.59±0.19        |
| 4                                   | 10         | 52.11±0.15         | 54.32±0.16        |
|                                     | 20         | 55.56±0.18         | 58.55±0.16        |
|                                     | 30         | 55.59±0.15         | 58.60±0.16        |
| 5                                   | 10         | 52.10±0.15         | 54.31±0.17        |
|                                     | 20         | 55.55±0.12         | 58.55±0.19        |
|                                     | 30         | 55.58±0.15         | 58.60±0.16        |
| 6                                   | 10         | 52.13±0.17         | 54.31±0.18        |
|                                     | 20         | 55.57±0.17         | 58.57±0.19        |
|                                     | 30         | 55.60±0.17         | 58.61±0.21        |

**Table S9.** Swelling Index of Dry Sheets at 40°C (n=3, data represents mean  $\pm$  SD).

| Duration of stability study (month) | Time (min) | Sample (Dry sheet) |                   |
|-------------------------------------|------------|--------------------|-------------------|
|                                     |            | WA Jarrah Honey    | WA Manuka Honey 2 |
| 1                                   | 10         | 52.21 $\pm$ 0.17   | 54.22 $\pm$ 0.18  |
|                                     | 20         | 55.56 $\pm$ 0.15   | 58.56 $\pm$ 0.19  |
|                                     | 30         | 55.60 $\pm$ 0.15   | 58.59 $\pm$ 0.17  |
| 2                                   | 10         | 52.22 $\pm$ 0.12   | 54.21 $\pm$ 0.16  |
|                                     | 20         | 55.56 $\pm$ 0.17   | 58.55 $\pm$ 0.16  |
|                                     | 30         | 55.60 $\pm$ 0.15   | 58.60 $\pm$ 0.16  |
| 3                                   | 10         | 52.17 $\pm$ 0.12   | 54.21 $\pm$ 0.19  |
|                                     | 20         | 55.57 $\pm$ 0.17   | 58.56 $\pm$ 0.17  |
|                                     | 30         | 55.59 $\pm$ 0.17   | 58.59 $\pm$ 0.19  |
| 4                                   | 10         | 52.21 $\pm$ 0.15   | 54.22 $\pm$ 0.16  |
|                                     | 20         | 55.56 $\pm$ 0.18   | 58.54 $\pm$ 0.16  |
|                                     | 30         | 55.59 $\pm$ 0.15   | 58.60 $\pm$ 0.16  |
| 5                                   | 10         | 52.14 $\pm$ 0.15   | 54.21 $\pm$ 0.17  |
|                                     | 20         | 55.56 $\pm$ 0.12   | 58.55 $\pm$ 0.19  |
|                                     | 30         | 55.59 $\pm$ 0.15   | 58.60 $\pm$ 0.16  |
| 6                                   | 10         | 52.14 $\pm$ 0.17   | 54.21 $\pm$ 0.18  |
|                                     | 20         | 55.57 $\pm$ 0.17   | 58.57 $\pm$ 0.19  |
|                                     | 30         | 55.60 $\pm$ 0.17   | 58.60 $\pm$ 0.21  |

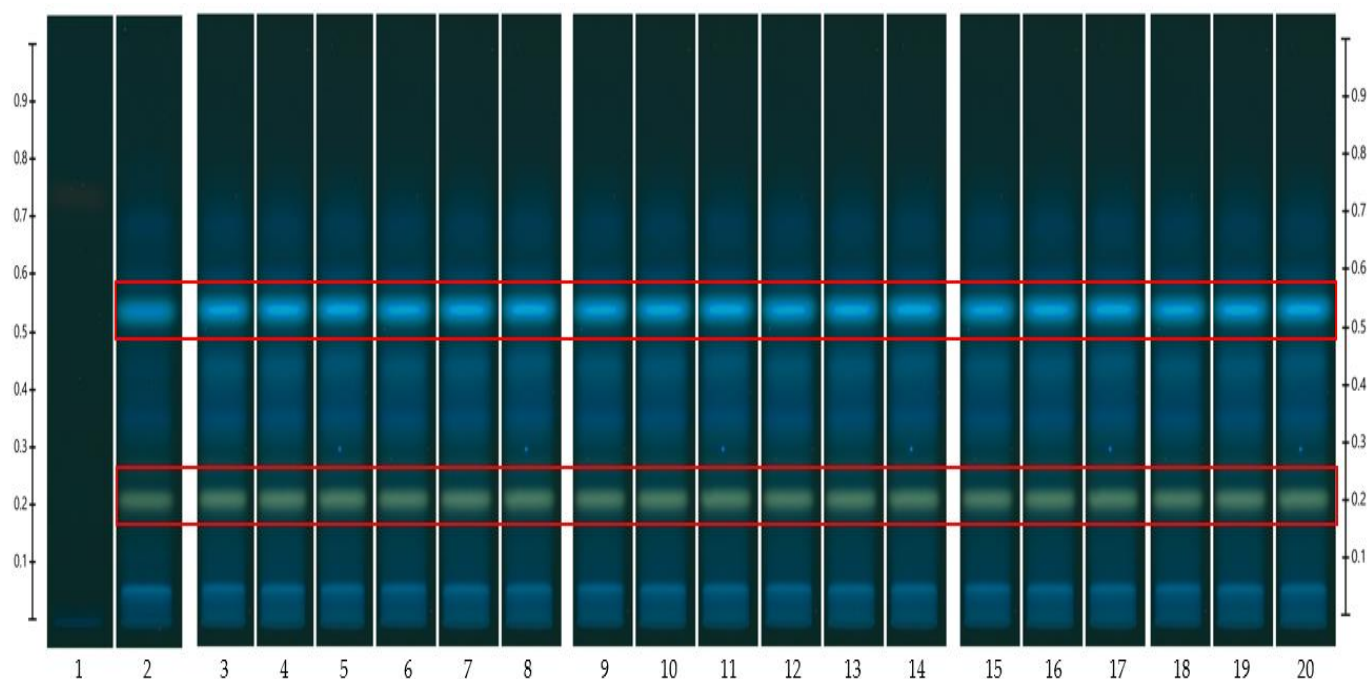

**Figure S1.** Jarrah (JAR) honey - Red box indicates the monitored bands at Rf 0.20 and 0.53; Track 1 - 4,5,7-trihydroxyflavone (internal standard), Track 2- JAR honey extract (system suitability test), Tracks 3-8 - JAR neat honey extract collected at 1-6 months storage at 5°C, Tracks 9-14 - JAR neat honey extract collected at 1-6 months storage at 30°C, Tracks 15-20 - JAR neat honey extract collected at 1-6 months storage at 40°C; Image taken at 366 nm.

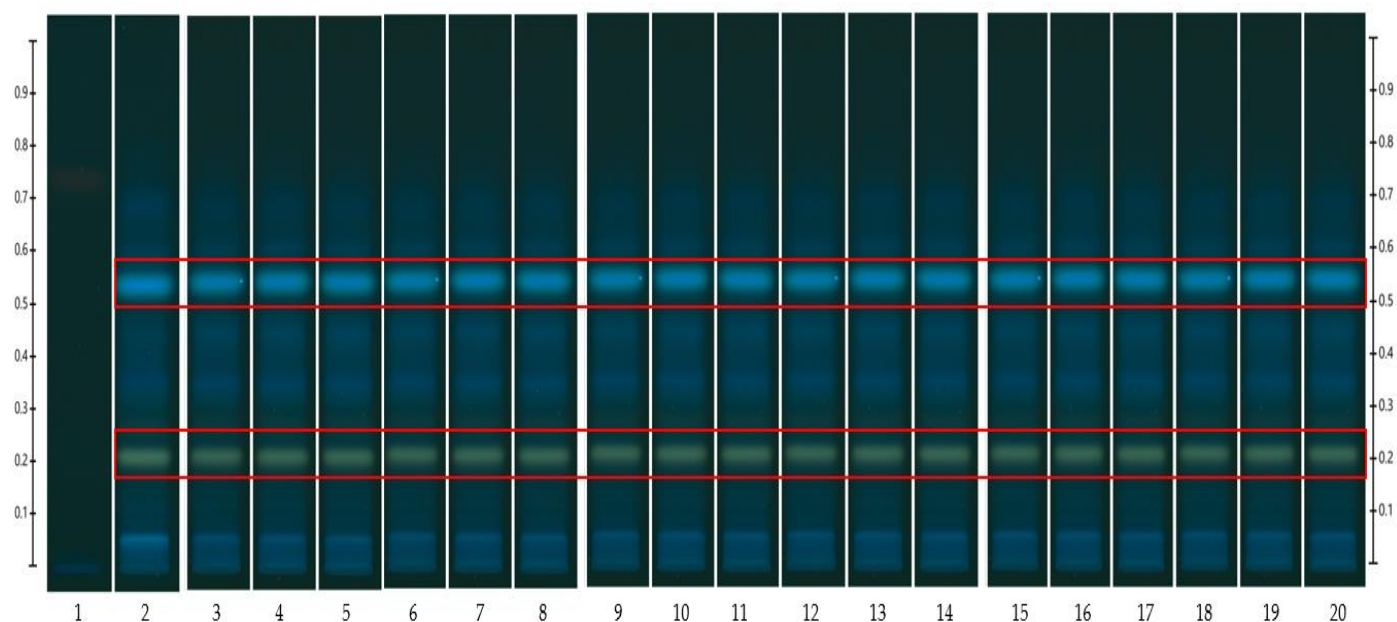

**Figure S2.** JAR honey - Red box indicates the monitored bands at Rf 0.20 and 0.53; Track 1 - 4,5,7-trihydroxyflavone (internal standard), Track 2- JAR honey extract (system suitability test), Tracks 3-8 - JAR pre-gel solution extract collected at 1-6 months storage at 5°C, Tracks 9-14 – JAR pre-gel solution extract collected at 1-6 months storage at 30°C, Tracks 15-20 – JAR pre-gel solution extract collected at 1-6 months storage at 40°C; Image taken at 366 nm.

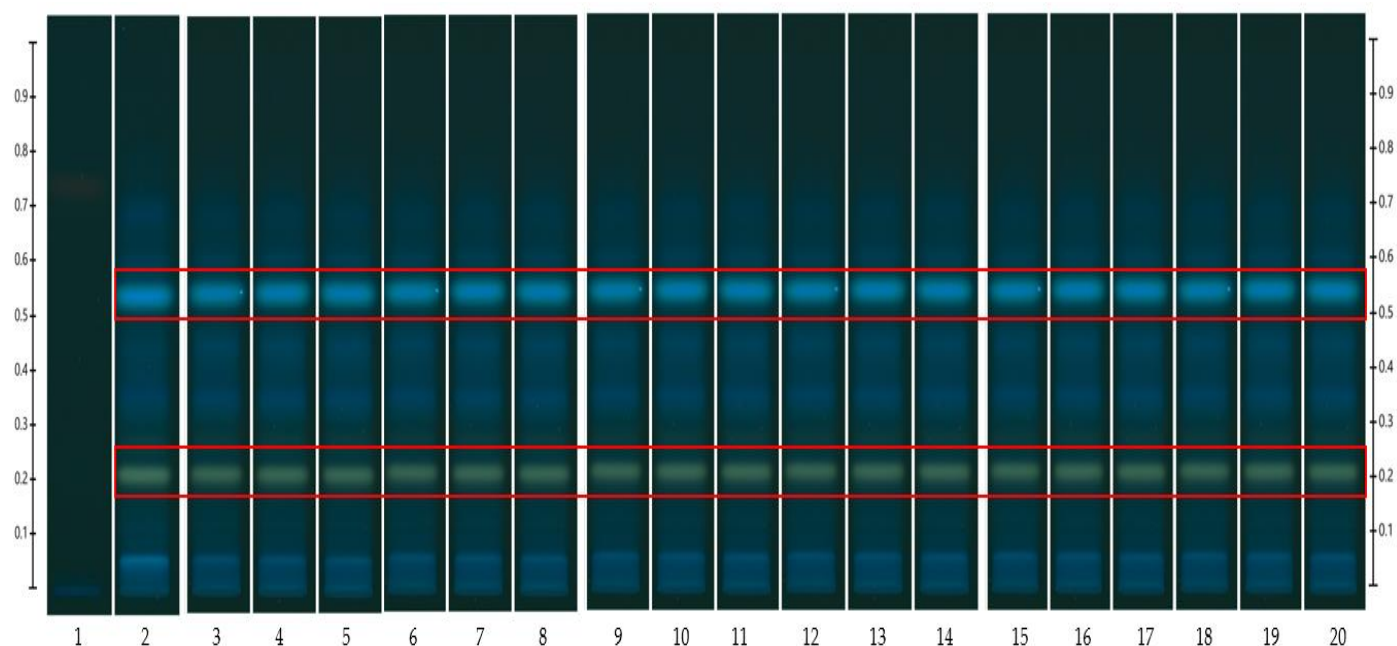

**Figure S3.** JAR honey - Red box indicates the monitored bands at Rf 0.20 and 0.53; Track 1 - 4,5,7-trihydroxyflavone (internal standard), Track 2- JAR honey extract (system suitability test), Tracks 3-8 - JAR wet sheet extract collected at 1-6 months storage at 5°C, Tracks 9-14 – JAR wet sheet extract collected at 1-6 months storage at 30°C, Tracks 15-20 – JAR wet sheet extract collected at 1-6 months storage at 40°C; Image taken at 366 nm.

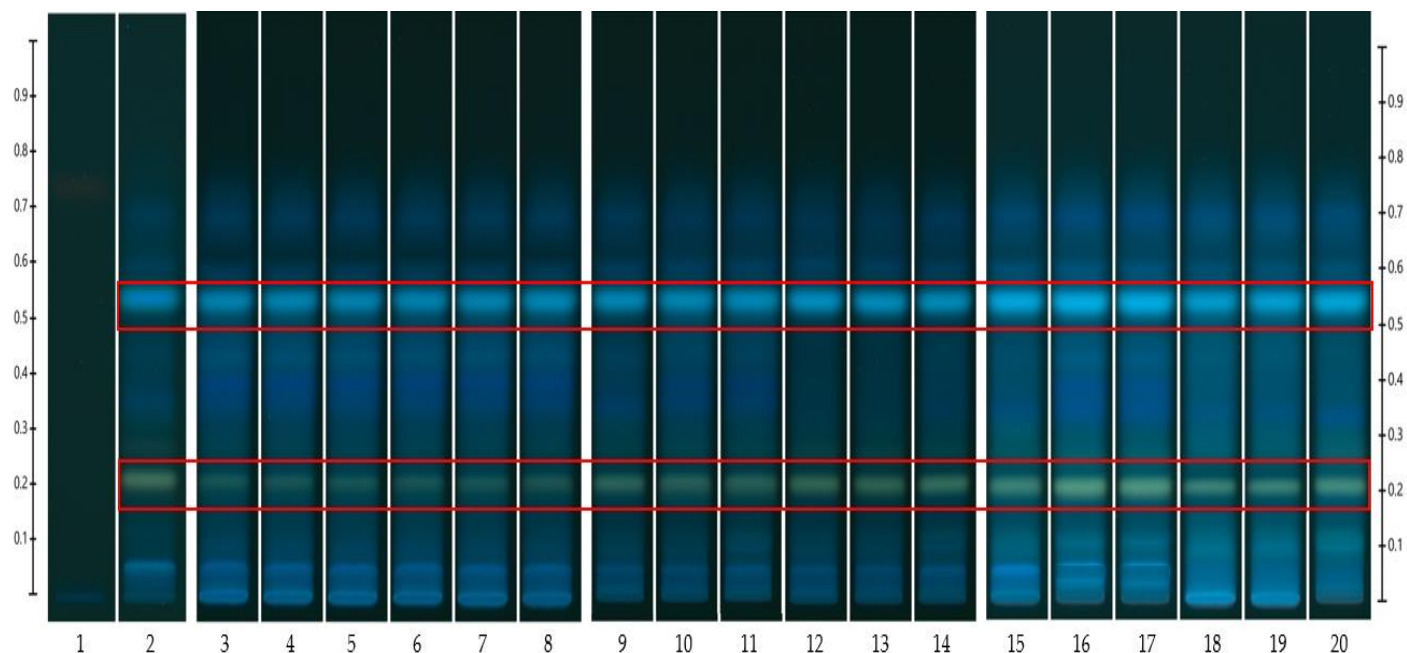

**Figure S4.** JAR honey - Red box indicates the monitored bands at Rf 0.20 and 0.53; Track 1 - 4,5,7-trihydroxyflavone (internal standard), Track 2- JAR honey extract (system suitability test), Tracks 3-8 - JAR dry sheet extract collected at 1-6 months storage at 5°C, Tracks 9-14 – JAR dry sheet extract collected at 1-6 months storage at 30°C, Tracks 15-20 – JAR dry sheet extract collected at 1-6 months storage at 40°C; Image taken at 366 nm.

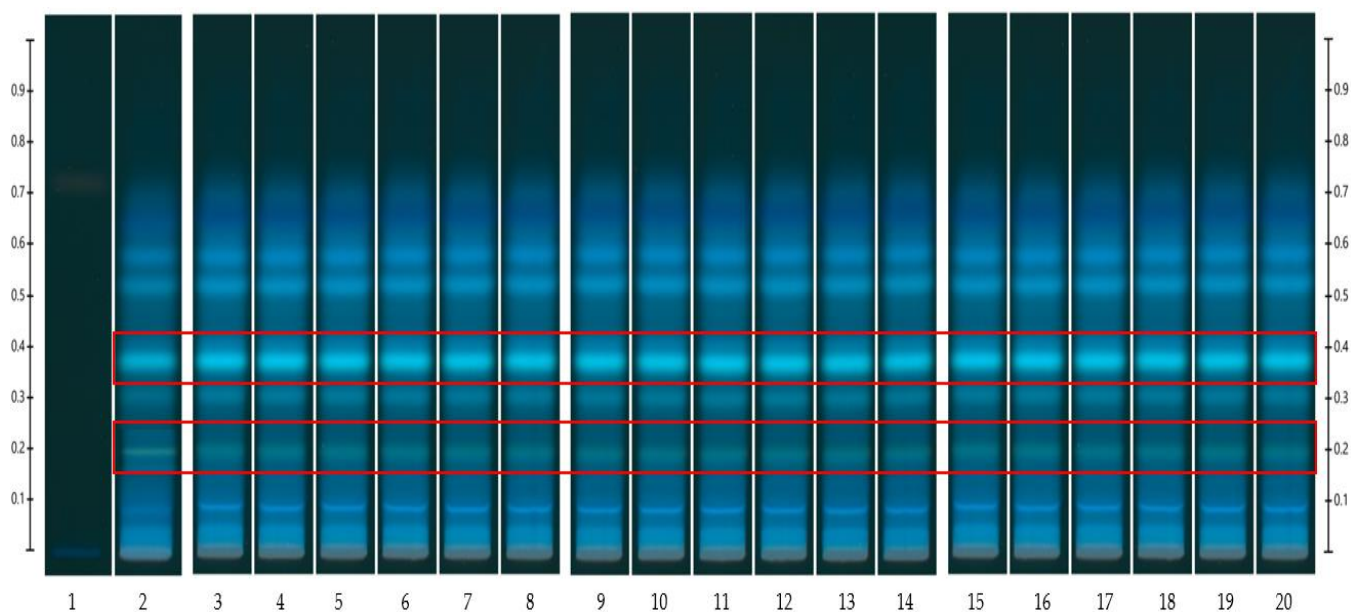

**Figure S5.** WA Manuka 2 (WAM2) honey - Red box indicates the monitored bands at Rf 0.20 and 0.38; Track 1 - 4,5,7-trihydroxyflavone (internal standard), Track 2- WAM 2 honey extract (system suitability test), Tracks 3-8 - WAM2 neat honey extract collected at 1-6 months storage at 5°C, Tracks 9-14 – WAM2 neat honey extract collected at 1-6 months storage at 30°C, Tracks 15-20 – WAM2 neat honey extract collected at 1-6 months storage at 40°C; Image taken at 366 nm.



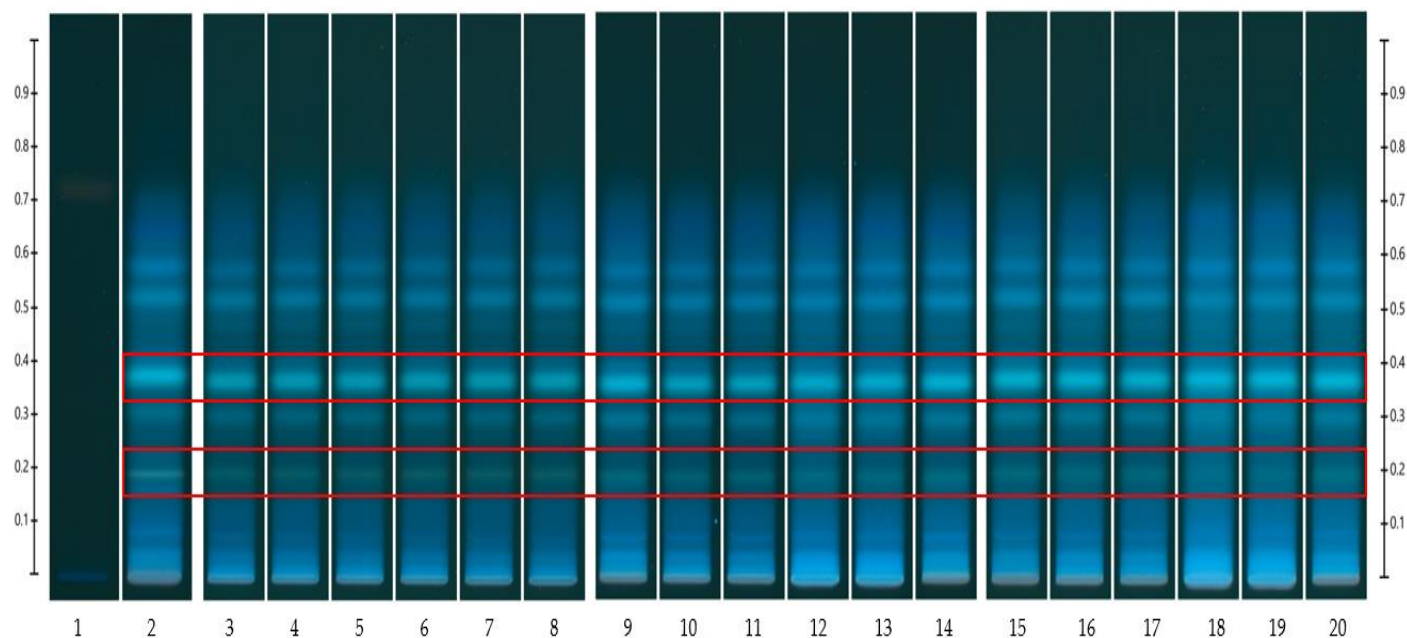

**Figure S6.** WAM2 honey - Red box indicates the monitored bands at Rf 0.20 and 0.38; Track 1 - 4,5,7-trihydroxyflavone (internal standard), Track 2- WAM 2 honey extract (system suitability test), Tracks 3-8 - WAM2 pre-gel solution extract collected at 1-6 months storage at 5°C, Tracks 9-14 – WAM2 pre-gel solution extract collected at 1-6 months storage at 30°C, Tracks 15-20 – WAM2 pre-gel solution extract collected at 1-6 months storage at 40°C; Image taken at 366 nm.

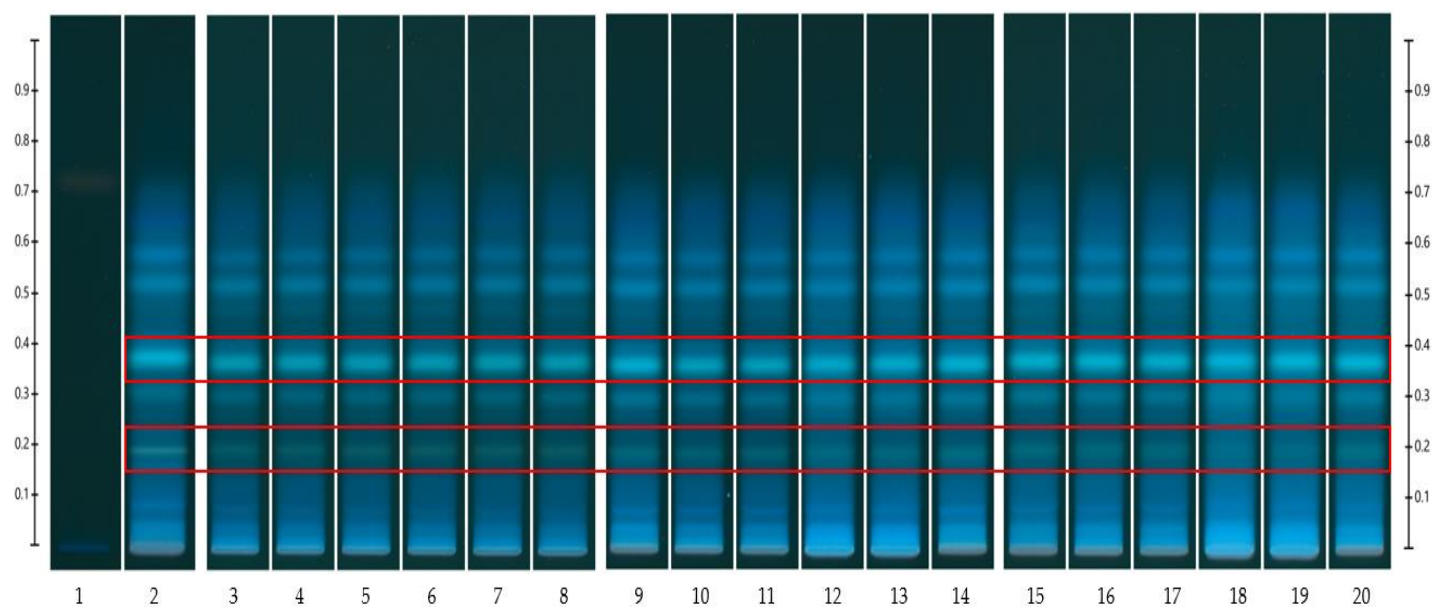

**Figure S7.** WAM2 honey - Red box indicates the monitored bands at Rf 0.20 and 0.38; Track 1 - 4,5,7-trihydroxyflavone (internal standard), Track 2- WAM 2 honey extract (system suitability test), Tracks 3-8 - WAM2 wet sheet extract collected at 1-6 months storage at 5°C, Tracks 9-14 – WAM2 wet sheet extract collected at 1-6 months storage at 30°C, Tracks 15-20 – WAM2 wet sheet extract collected at 1-6 months storage at 40°C; Image taken at 366 nm.



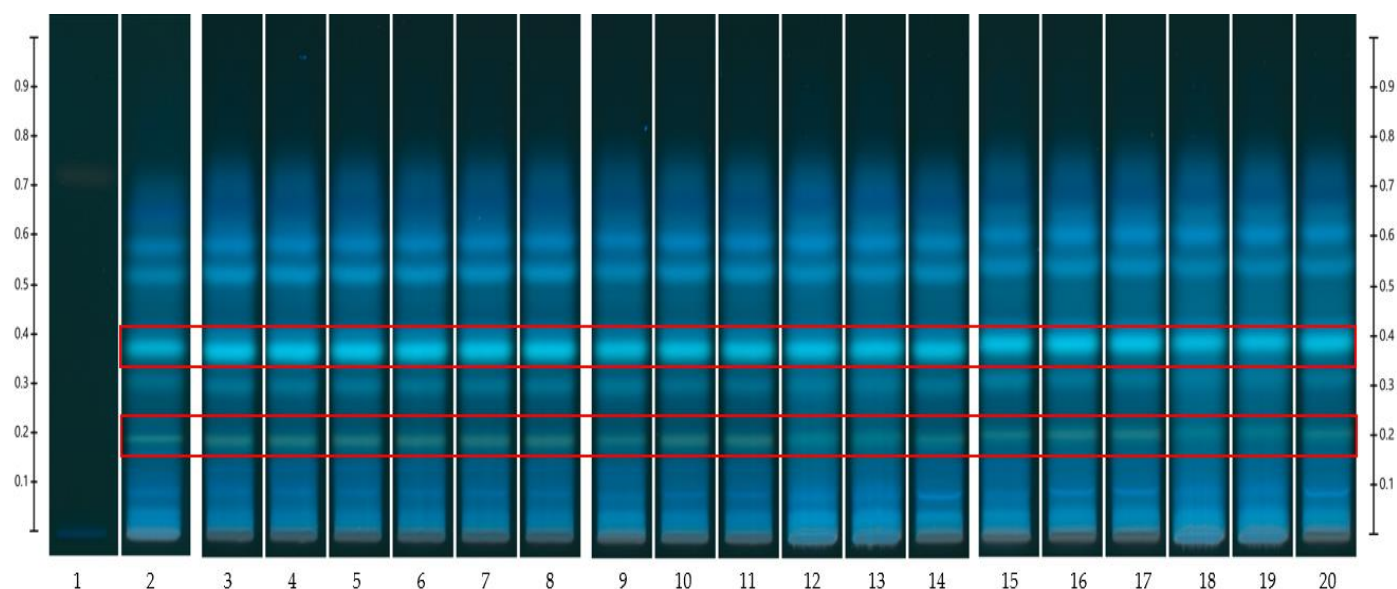

**Figure S8.** WAM2 honey - Red box indicates the monitored bands at Rf 0.20 and 0.38; Track 1 - 4,5,7-trihydroxyflavone (internal standard), Track 2- WAM 2 honey extract (system suitability test), Tracks 3-8 - WAM2 dry sheet extract collected at 1-6 months storage at 5°C, Tracks 9-14 – WAM2 dry sheet extract collected at 1-6 months storage at 30°C, Tracks 15-20 – WAM2 dry sheet extract collected at 1-6 months storage at 40°C; Image taken at 366 nm.

**Table S10.** Peak area of selected bands of Jarrah honey and WA Manuka honey 2 and their respective formulations (n=3, data represents mean  $\pm$  SD).

| Honey       | Storage temperature (°C) | Sample     | Weight (g) | Rf of Monitored Compound | Peak area (AU $\times 10^{-3}$ ) per band |                 |                 |                 |                 |                 |
|-------------|--------------------------|------------|------------|--------------------------|-------------------------------------------|-----------------|-----------------|-----------------|-----------------|-----------------|
|             |                          |            |            |                          | 1 month                                   | 2 month         | 3 month         | 4 month         | 5 month         | 6 month         |
| WA Jarrah   | 5                        | Neat honey | 1.01       | 0.20                     | 5.3 $\pm$ 0.01                            | 5.3 $\pm$ 0.02  | 5.3 $\pm$ 0.02  | 5.3 $\pm$ 0.02  | 5.2 $\pm$ 0.01  | 5.3 $\pm$ 0.01  |
|             |                          |            |            | 0.53                     | 15.2 $\pm$ 0.02                           | 15.2 $\pm$ 0.02 | 15.2 $\pm$ 0.02 | 15.2 $\pm$ 0.02 | 15.2 $\pm$ 0.02 | 15.2 $\pm$ 0.02 |
|             |                          | Pre-gel    | 1.02       | 0.20                     | 5.3 $\pm$ 0.03                            | 5.3 $\pm$ 0.03  | 5.3 $\pm$ 0.04  | 5.3 $\pm$ 0.04  | 5.2 $\pm$ 0.03  | 5.3 $\pm$ 0.03  |
|             |                          |            |            | 0.53                     | 15.2 $\pm$ 0.02                           | 15.2 $\pm$ 0.02 | 15.2 $\pm$ 0.03 | 15.2 $\pm$ 0.02 | 15.2 $\pm$ 0.03 | 15.2 $\pm$ 0.02 |
|             |                          | Wet sheet  | 1.01       | 0.20                     | 5.2 $\pm$ 0.01                            | 5.2 $\pm$ 0.01  | 5.2 $\pm$ 0.01  | 5.2 $\pm$ 0.01  | 5.2 $\pm$ 0.01  | 5.2 $\pm$ 0.01  |
|             |                          |            |            | 0.53                     | 14.8 $\pm$ 0.03                           | 14.8 $\pm$ 0.03 | 14.8 $\pm$ 0.03 | 14.8 $\pm$ 0.03 | 14.8 $\pm$ 0.03 | 14.8 $\pm$ 0.03 |
|             | 30                       | Dry sheet  | 1.02       | 0.20                     | 14.0 $\pm$ 0.04                           | 14.0 $\pm$ 0.02 |
|             |                          |            |            | 0.53                     | 40.8 $\pm$ 0.03                           | 40.8 $\pm$ 0.03 | 40.7 $\pm$ 0.03 | 40.8 $\pm$ 0.03 | 40.7 $\pm$ 0.03 | 40.8 $\pm$ 0.02 |
|             |                          | Neat honey | 1.02       | 0.20                     | 5.2 $\pm$ 0.02                            | 5.3 $\pm$ 0.02  | 5.2 $\pm$ 0.02  | 5.3 $\pm$ 0.02  | 5.2 $\pm$ 0.01  | 5.2 $\pm$ 0.03  |
|             |                          |            |            | 0.53                     | 15.2 $\pm$ 0.02                           | 15.2 $\pm$ 0.03 | 15.2 $\pm$ 0.02 | 15.2 $\pm$ 0.02 | 15.2 $\pm$ 0.03 | 15.2 $\pm$ 0.02 |
|             |                          | Pre-gel    | 1.01       | 0.20                     | 5.2 $\pm$ 0.02                            | 5.2 $\pm$ 0.03  | 5.2 $\pm$ 0.03  | 5.2 $\pm$ 0.02  | 5.2 $\pm$ 0.03  | 5.2 $\pm$ 0.02  |
|             |                          |            |            | 0.53                     | 15.2 $\pm$ 0.02                           | 15.2 $\pm$ 0.02 | 15.2 $\pm$ 0.03 | 15.2 $\pm$ 0.02 | 15.2 $\pm$ 0.03 | 15.2 $\pm$ 0.02 |
| WA Manuka 2 | 40                       | Wet sheet  | 1.02       | 0.20                     | 5.1 $\pm$ 0.01                            | 5.1 $\pm$ 0.01  | 5.1 $\pm$ 0.02  | 5.1 $\pm$ 0.01  | 5.1 $\pm$ 0.02  | 5.1 $\pm$ 0.02  |
|             |                          |            |            | 0.53                     | 14.8 $\pm$ 0.03                           | 14.8 $\pm$ 0.03 | 14.8 $\pm$ 0.02 | 14.8 $\pm$ 0.03 | 14.8 $\pm$ 0.02 | 14.8 $\pm$ 0.03 |
|             |                          | Dry sheet  | 1.02       | 0.20                     | 14.1 $\pm$ 0.03                           | 14.1 $\pm$ 0.02 | 14.1 $\pm$ 0.02 | 14.1 $\pm$ 0.02 | 14.1 $\pm$ 0.02 | 14.1 $\pm$ 0.03 |
|             |                          |            |            | 0.53                     | 40.8 $\pm$ 0.03                           | 40.8 $\pm$ 0.03 | 40.7 $\pm$ 0.03 | 40.8 $\pm$ 0.03 | 40.7 $\pm$ 0.03 | 40.8 $\pm$ 0.02 |
|             |                          | Neat honey | 1.01       | 0.20                     | 5.2 $\pm$ 0.01                            | 5.2 $\pm$ 0.02  | 5.2 $\pm$ 0.02  | 5.2 $\pm$ 0.02  | 5.2 $\pm$ 0.01  | 5.2 $\pm$ 0.01  |
|             |                          |            |            | 0.53                     | 15.2 $\pm$ 0.01                           | 15.2 $\pm$ 0.02 | 15.2 $\pm$ 0.01 | 15.2 $\pm$ 0.02 | 15.2 $\pm$ 0.02 | 15.2 $\pm$ 0.01 |
|             | 5                        | Pre-gel    | 1.02       | 0.20                     | 5.2 $\pm$ 0.03                            | 5.2 $\pm$ 0.03  | 5.2 $\pm$ 0.04  | 5.2 $\pm$ 0.02  | 5.2 $\pm$ 0.03  | 5.2 $\pm$ 0.02  |
|             |                          |            |            | 0.53                     | 15.2 $\pm$ 0.02                           | 15.2 $\pm$ 0.02 | 15.2 $\pm$ 0.03 | 15.2 $\pm$ 0.02 | 15.2 $\pm$ 0.03 | 15.2 $\pm$ 0.02 |
|             |                          | Wet sheet  | 1.01       | 0.20                     | 5.1 $\pm$ 0.02                            | 5.1 $\pm$ 0.01  | 5.1 $\pm$ 0.01  | 5.1 $\pm$ 0.02  | 5.1 $\pm$ 0.01  | 5.1 $\pm$ 0.02  |
|             |                          |            |            | 0.53                     | 14.8 $\pm$ 0.02                           | 14.8 $\pm$ 0.02 | 14.8 $\pm$ 0.03 | 14.8 $\pm$ 0.03 | 14.8 $\pm$ 0.02 | 14.8 $\pm$ 0.03 |
|             |                          | Dry sheet  | 1.01       | 0.20                     | 14.0 $\pm$ 0.03                           | 14.1 $\pm$ 0.02 | 14.0 $\pm$ 0.03 | 14.0 $\pm$ 0.02 | 14.0 $\pm$ 0.02 | 14.0 $\pm$ 0.02 |
|             |                          |            |            | 0.53                     | 40.8 $\pm$ 0.02                           | 40.8 $\pm$ 0.03 | 40.8 $\pm$ 0.03 | 40.8 $\pm$ 0.03 | 40.8 $\pm$ 0.03 | 40.8 $\pm$ 0.02 |
|             | 5                        | Neat honey | 1.01       | 0.20                     | 17.4 $\pm$ 0.03                           | 17.4 $\pm$ 0.03 | 17.4 $\pm$ 0.03 | 17.4 $\pm$ 0.04 | 17.4 $\pm$ 0.03 | 17.4 $\pm$ 0.03 |
|             |                          |            |            | 0.38                     | 23.5 $\pm$ 0.03                           | 23.5 $\pm$ 0.04 | 23.5 $\pm$ 0.03 | 23.5 $\pm$ 0.04 | 23.5 $\pm$ 0.04 | 23.5 $\pm$ 0.02 |
|             |                          | Pre-gel    | 1.02       | 0.20                     | 17.3 $\pm$ 0.03                           | 17.3 $\pm$ 0.03 | 17.3 $\pm$ 0.02 | 17.3 $\pm$ 0.03 | 17.3 $\pm$ 0.02 | 17.3 $\pm$ 0.03 |
|             |                          |            |            | 0.38                     | 23.4 $\pm$ 0.02                           | 23.4 $\pm$ 0.02 | 23.4 $\pm$ 0.01 | 23.4 $\pm$ 0.02 | 23.4 $\pm$ 0.01 | 23.4 $\pm$ 0.03 |
|             |                          | Wet sheet  | 1.02       | 0.20                     | 17.1 $\pm$ 0.03                           | 17.1 $\pm$ 0.03 | 17.1 $\pm$ 0.04 | 17.1 $\pm$ 0.04 | 17.1 $\pm$ 0.03 | 17.1 $\pm$ 0.04 |
|             |                          |            |            | 0.38                     | 23.3 $\pm$ 0.02                           | 23.3 $\pm$ 0.04 | 23.3 $\pm$ 0.04 | 23.3 $\pm$ 0.03 | 23.3 $\pm$ 0.04 | 23.3 $\pm$ 0.03 |
|             | 40                       | Dry sheet  | 1.01       | 0.20                     | 47.5 $\pm$ 0.03                           | 47.5 $\pm$ 0.04 | 47.5 $\pm$ 0.03 | 47.5 $\pm$ 0.04 | 47.5 $\pm$ 0.02 | 47.5 $\pm$ 0.03 |
|             |                          |            |            | 0.38                     | 64.9 $\pm$ 0.02                           | 64.9 $\pm$ 0.03 | 64.9 $\pm$ 0.02 | 64.9 $\pm$ 0.03 | 64.9 $\pm$ 0.02 | 64.9 $\pm$ 0.02 |

|    |            |      |      |           |           |           |           |           |           |
|----|------------|------|------|-----------|-----------|-----------|-----------|-----------|-----------|
| 30 | Neat honey | 1.02 | 0.20 | 17.4±0.03 | 17.4±0.03 | 17.4±0.03 | 17.4±0.04 | 17.4±0.03 | 17.4±0.03 |
|    |            |      | 0.38 | 23.5±0.03 | 23.5±0.04 | 23.5±0.03 | 23.5±0.04 | 23.5±0.04 | 23.5±0.02 |
|    | Pre-gel    | 1.01 | 0.20 | 17.3±0.03 | 17.3±0.03 | 17.3±0.02 | 17.3±0.03 | 17.3±0.02 | 17.3±0.03 |
|    |            |      | 0.38 | 23.4±0.02 | 23.4±0.02 | 23.4±0.01 | 23.4±0.02 | 23.4±0.01 | 23.4±0.02 |
|    | Wet sheet  | 1.02 | 0.20 | 17.2±0.03 | 17.2±0.03 | 17.2±0.04 | 17.2±0.04 | 17.2±0.03 | 17.2±0.04 |
|    |            |      | 0.38 | 23.3±0.02 | 23.3±0.04 | 23.3±0.04 | 23.3±0.03 | 23.3±0.04 | 23.3±0.03 |
|    | Dry sheet  | 1.02 | 0.20 | 47.6±0.03 | 47.6±0.04 | 47.6±0.03 | 47.6±0.04 | 47.6±0.02 | 47.6±0.03 |
|    |            |      | 0.38 | 65.0±0.02 | 65.0±0.03 | 65.0±0.02 | 65.0±0.03 | 65.0±0.02 | 65.0±0.03 |
|    | Neat honey | 1.01 | 0.20 | 17.4±0.03 | 17.4±0.03 | 17.4±0.03 | 17.4±0.04 | 17.4±0.03 | 17.4±0.03 |
|    |            |      | 0.38 | 23.5±0.02 | 23.5±0.04 | 23.5±0.03 | 23.5±0.04 | 23.5±0.04 | 23.5±0.02 |
|    | Pre-gel    | 1.02 | 0.20 | 17.3±0.03 | 17.3±0.03 | 17.3±0.02 | 17.3±0.03 | 17.3±0.02 | 17.3±0.03 |
|    |            |      | 0.38 | 23.4±0.03 | 23.4±0.02 | 23.4±0.01 | 23.4±0.02 | 23.4±0.01 | 23.4±0.03 |
| 40 | Wet sheet  | 1.02 | 0.20 | 17.1±0.03 | 17.1±0.03 | 17.1±0.04 | 17.1±0.02 | 17.1±0.03 | 17.1±0.02 |
|    |            |      | 0.38 | 23.3±0.02 | 23.3±0.04 | 23.3±0.04 | 23.3±0.03 | 23.3±0.04 | 23.3±0.03 |
|    | Dry sheet  | 1.02 | 0.20 | 47.5±0.03 | 47.5±0.03 | 47.5±0.03 | 47.5±0.03 | 47.5±0.02 | 47.5±0.03 |
|    |            |      | 0.38 | 64.9±0.03 | 64.9±0.03 | 64.9±0.02 | 64.9±0.03 | 64.9±0.02 | 64.9±0.02 |
|    |            |      |      |           |           |           |           |           |           |
|    |            |      |      |           |           |           |           |           |           |

**Table S11.** Peak area of selected bands in wet and dry sheets of Jarrah and WA Manuka honey (n=3, data represents mean ± SD).

| Honey       | Storage temperature (°C) | Sample    | Weight (g) | Rf of Monitored Compound | Peak area (AU x 10 <sup>-3</sup> ) per sheet |          |          |          |          |          |
|-------------|--------------------------|-----------|------------|--------------------------|----------------------------------------------|----------|----------|----------|----------|----------|
|             |                          |           |            |                          | 1 month                                      | 2 month  | 3 month  | 4 month  | 5 month  | 6 month  |
| WA Jarrah   | 5                        | Wet sheet | 1.01       | 0.20                     | 130±0.02                                     | 130±0.02 | 130±0.01 | 130±0.02 | 130±0.02 | 130±0.01 |
|             |                          |           |            | 0.53                     | 370±0.02                                     | 370±0.02 | 370±0.03 | 370±0.02 | 370±0.03 | 370±0.02 |
|             |                          | Dry sheet | 1.02       | 0.20                     | 126±0.01                                     | 126±0.02 | 126±0.01 | 126±0.02 | 126±0.02 | 126±0.01 |
|             |                          |           |            | 0.53                     | 367±0.03                                     | 367±0.03 | 366±0.02 | 367±0.02 | 366±0.03 | 367±0.02 |
|             | 30                       | Wet sheet | 1.02       | 0.20                     | 128±0.02                                     | 128±0.02 | 128±0.02 | 127±0.02 | 128±0.02 | 128±0.02 |
|             |                          |           |            | 0.53                     | 370±0.03                                     | 371±0.03 | 370±0.03 | 370±0.03 | 371±0.03 | 370±0.03 |
|             |                          | Dry sheet | 1.01       | 0.20                     | 127±0.03                                     | 127±0.03 | 127±0.03 | 127±0.03 | 127±0.03 | 127±0.02 |
|             |                          |           |            | 0.53                     | 367±0.02                                     | 367±0.03 | 368±0.02 | 367±0.02 | 368±0.02 | 367±0.02 |
|             | 40                       | Wet sheet | 1.02       | 0.20                     | 128±0.02                                     | 127±0.02 | 128±0.02 | 127±0.02 | 128±0.02 | 127±0.02 |
|             |                          |           |            | 0.53                     | 369±0.02                                     | 369±0.02 | 369±0.02 | 369±0.02 | 369±0.02 | 369±0.02 |
|             |                          | Dry sheet | 1.01       | 0.20                     | 126±0.03                                     | 127±0.03 | 126±0.03 | 127±0.03 | 126±0.03 | 127±0.01 |
|             |                          |           |            | 0.53                     | 367±0.02                                     | 368±0.02 | 368±0.02 | 367±0.01 | 367±0.02 | 367±0.02 |
| WA Manuka 2 | 5                        | Wet sheet | 1.01       | 0.20                     | 427±0.02                                     | 427±0.02 | 426±0.03 | 427±0.02 | 426±0.03 | 427±0.02 |
|             |                          |           |            | 0.38                     | 582±0.03                                     | 582±0.03 | 583±0.03 | 582±0.03 | 582±0.03 | 583±0.03 |
|             |                          | Dry sheet | 1.01       | 0.20                     | 428±0.03                                     | 428±0.03 | 427±0.02 | 428±0.03 | 427±0.02 | 428±0.03 |
|             |                          |           |            | 0.38                     | 584±0.03                                     | 585±0.03 | 584±0.03 | 585±0.03 | 584±0.02 | 584±0.03 |
|             | 30                       | Wet sheet | 1.02       | 0.20                     | 428±0.02                                     | 428±0.02 | 428±0.02 | 428±0.02 | 428±0.02 | 428±0.02 |
|             |                          |           |            | 0.38                     | 581±0.03                                     | 582±0.03 | 581±0.03 | 582±0.03 | 581±0.02 | 581±0.03 |
|             |                          | Dry sheet | 1.02       | 0.20                     | 427±0.03                                     | 428±0.03 | 427±0.03 | 428±0.03 | 427±0.03 | 427±0.03 |
|             |                          |           |            | 0.38                     | 585±0.02                                     | 585±0.02 | 584±0.02 | 585±0.02 | 584±0.02 | 585±0.02 |
|             | 40                       | Wet sheet | 1.01       | 0.20                     | 427±0.03                                     | 428±0.03 | 427±0.03 | 427±0.03 | 428±0.03 | 427±0.03 |
|             |                          |           |            | 0.38                     | 582±0.02                                     | 581±0.02 | 581±0.02 | 582±0.02 | 581±0.02 | 582±0.02 |
|             |                          | Dry sheet | 1.02       | 0.20                     | 427±0.02                                     | 426±0.02 | 426±0.02 | 427±0.02 | 426±0.02 | 427±0.02 |
|             |                          |           |            | 0.38                     | 584±0.02                                     | 584±0.02 | 585±0.02 | 584±0.02 | 585±0.02 | 584±0.02 |

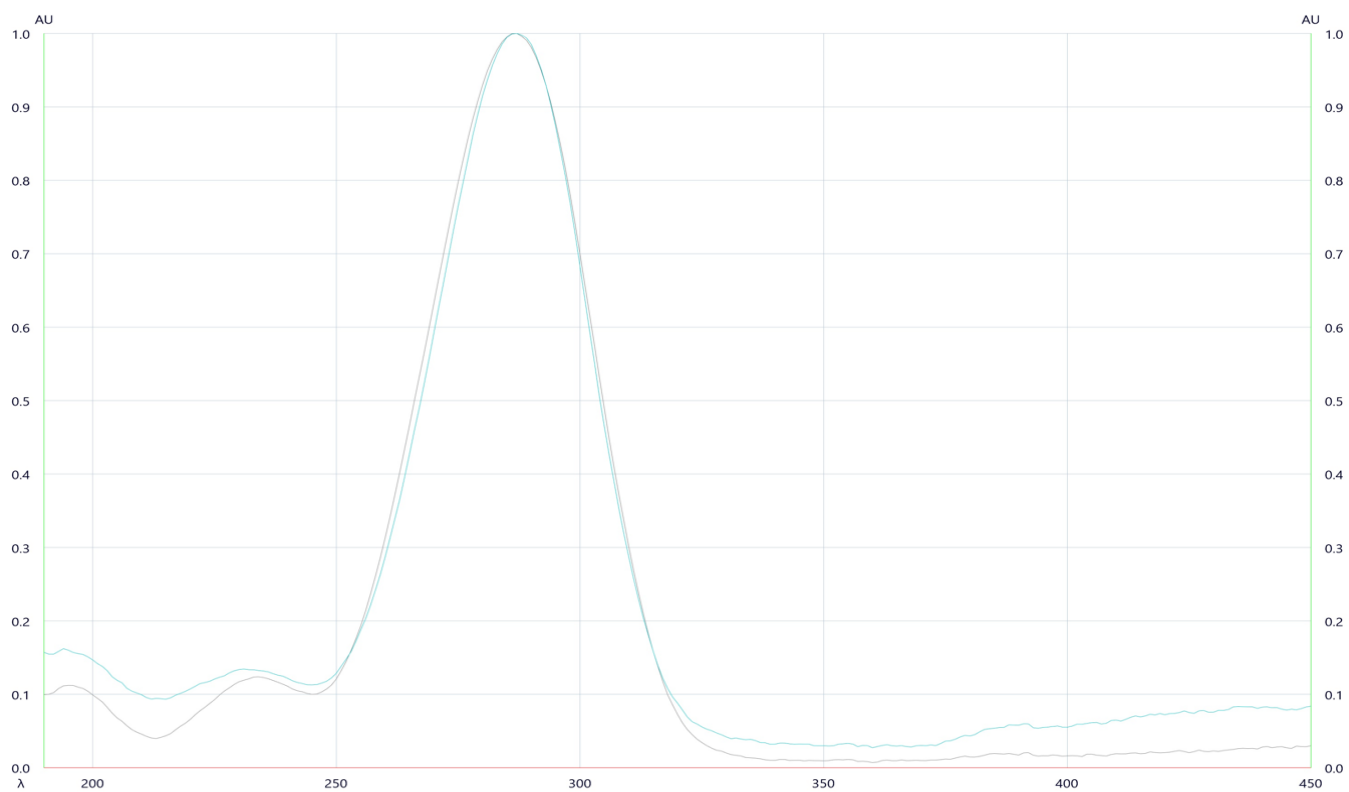

**Figure S9.** Absorbance spectra of HMF aqueous solution (grey line) and honey extract (blue line).
